# Supplementary material for: Quantitative determination of human serum testosterone via isotope dilution ultra-performance liquid chromatography tandem mass spectrometry
Source: PubMed Central journal article supplement — Mol Med Rep. 2020 Jun 15;22(2):1576–82. doi: 10.3892/mmr.2020.11235 (PMC7339657; doi:10.3892/mmr.2020.11235), 2020-06-15
Supplement: Supplementary_Data.pdf [file Supplementary_Data.pdf]

Table SI. Gradient elution procedures for ultra-performance liquid chromatography.

| Time (min) | Flow rate (ml/min) | Mobile phase A (%) | Mobile phase B (%) |
|------------|--------------------|--------------------|--------------------|
| 0.00       | 0.40               | 95.0               | 5.0                |
| 0.10       | 0.40               | 95.0               | 5.0                |
| 2.50       | 0.40               | 5.0                | 95.0               |
| 3.00       | 0.40               | 5.0                | 95.0               |
| 3.10       | 0.40               | 95.0               | 5.0                |
| 5.00       | 0.40               | 95.0               | 5.0                |

Table SII. Comparison of testosterone concentrations obtained from diluted and undiluted serum samples.

| Sample    | Mean concentration (ng/dl)    | Recovery (%)                 |
|-----------|-------------------------------|------------------------------|
| Undiluted | 671.06 (95%CI: 658.59-683.52) | - <sup>a</sup>               |
| Diluted   | 675.45 (95%CI: 668.87-682.02) | 100.37 (95%CI: 99.30-101.44) |

<sup>a</sup>Not applicable.
